# Supplementary material for: Severity of Liver Fibrosis Is Associated with the Japanese Diet Pattern and Skeletal Muscle Mass in Patients with Nonalcoholic Fatty Liver Disease
Source: MDPI journal article supplement (doi:10.3390/nu15051175), 2023-02-26
Supplement: s1 [file s1]

Table S1 Association between mJDI12 and nutrients intake in study subjects

|                      | Male    |       |                |         | Female  |       |                |         |
|----------------------|---------|-------|----------------|---------|---------|-------|----------------|---------|
|                      | $\beta$ | B     | 95% CI         | P value | $\beta$ | B     | 95% CI         | P value |
| Protein              | 0.27    | 1.09  | 0.45, 1.74     | 0.001   | 0.32    | 1.33  | 0.34, 2.32     | 0.009   |
| Fat                  | -0.05   | -0.14 | -0.93, 0.65    | 0.73    | -0.05   | -0.15 | -0.93, 0.64    | 0.71    |
| Carbohydrate         | -0.10   | -0.96 | -3.41, 1.49    | 0.44    | -0.05   | -0.52 | -3.00, 1.96    | 0.68    |
| Potassium            | 0.38    | 64.23 | 23.70, 104.76  | 0.002   | 0.51    | 86.74 | 51.58, 121.90  | <0.001  |
| Calcium              | 0.24    | 10.49 | -0.17, 21.14   | 0.05    | 0.33    | 15.18 | 4.72, 25.65    | 0.005   |
| Magnesium            | 0.46    | 5.76  | 2.87, 8.65     | <0.001  | 0.54    | 7.94  | 4.89, 10.98    | <0.001  |
| Iron                 | 0.52    | 0.27  | 0.15, 0.39     | <0.001  | 0.64    | 0.35  | 0.25, 0.46     | <0.001  |
| Folic acid           | 0.47    | 14.83 | 7.48, 22.18    | <0.001  | 0.63    | 19.34 | 13.40, 25.25   | <0.001  |
| Vitamin C            | 0.47    | 5.75  | 2.94, 8.56     | <0.001  | 0.56    | 7.3   | 4.70, 9.90     | <0.001  |
| $\beta$ -carotene    | 0.52    | 263.2 | 147.30, 379.09 | <0.001  | 0.52    | 244.2 | 144.22, 344.18 | <0.001  |
| $\alpha$ -tocopherol | 0.33    | 0.16  | 0.04, 0.28     | 0.009   | 0.35    | 0.18  | 0.06, 0.29     | 0.004   |
| SFA                  | -0.12   | -0.13 | -0.42, 0.15    | 0.36    | -0.17   | -0.15 | -0.37, 0.07    | 0.18    |
| MUFA                 | -0.1    | -0.12 | -0.43, 0.18    | 0.43    | -0.13   | -0.17 | -0.49, 0.16    | 0.31    |
| PUFA                 | 0.08    | 0.06  | -0.13, 0.25    | 0.54    | 0.1     | 0.1   | -0.15, 0.34    | 0.43    |
| n-3 PUFA             | 0.24    | 0.05  | -0.002, 0.11   | 0.06    | 0.23    | 0.06  | -0.003, 0.12   | 0.06    |
| n-6 PUFA             | 0.01    | 0.01  | -0.15, 0.16    | 0.95    | 0.05    | 0.04  | -0.16, 0.23    | 0.70    |
| Cholesterol          | 0.25    | 10.48 | -0.26, 21.21   | 0.06    | 0.28    | 12.96 | 1.84, 24.09    | 0.02    |
| Dietary fiber        | 0.48    | 0.39  | 0.21, 0.58     | <0.001  | 0.63    | 0.54  | 0.38, 0.71     | <0.001  |
| Salt equivalent      | 0.17    | 0.11  | -0.06, 0.28    | 0.20    | 0.32    | 0.21  | 0.06, 0.36     | 0.008   |

The association of each data was analyzed by multiple regression analysis. Age, BMI were adjusted. B; partial regression coefficient,  $\beta$ ; standardized partial regression coefficient, CI; confidence interval, mJDI12; 12-component modified Japanese diet index, MUFA; monounsaturated fatty acids, PUFA; polyunsaturated fatty acids, RA; rheumatoid arthritis, SFA; saturated fatty acids

Table S2 Logistic regression analysis of mJDI12 components for Agile3+ score intermediate-high risk

|         |                             | OR   | 95%CI       | p value |
|---------|-----------------------------|------|-------------|---------|
| model 1 | Soybeans and soybean foods  | 0.98 | 0.96, 1.01  | 0.11    |
| model 2 | <25 percentile (reference)  | -    | -           |         |
|         | ≥25 to <50 percentile       | 0.41 | 0.11, 1.57  | 0.19    |
|         | ≥50 to <75 percentile       | 0.40 | 0.10, 1.65  | 0.20    |
|         | ≥75 percentile              | 0.15 | 0.03, 0.71  | 0.017   |
| model 1 | Green and yellow vegetables | 1.00 | 0.99, 1.02  | 0.96    |
| model 2 | <25 percentile (reference)  | -    | -           |         |
|         | ≥25 to <50 percentile       | 0.12 | 0.02, 0.62  | 0.012   |
|         | ≥50 to <75 percentile       | 0.50 | 0.13, 1.91  | 0.31    |
|         | ≥75 percentile              | 0.40 | 0.10, 1.64  | 0.20    |
| model 1 | Fruit                       | 1.00 | 0.99, 1.01  | 0.52    |
| model 2 | <25 percentile (reference)  | -    | -           |         |
|         | ≥25 to <50 percentile       | 0.45 | 0.11, 1.84  | 0.27    |
|         | ≥50 to <75 percentile       | 0.54 | 0.14, 2.11  | 0.38    |
|         | ≥75 percentile              | 0.47 | 0.12, 1.91  | 0.29    |
| model 1 | Fish and shellfish          | 0.99 | 0.97, 1.01  | 0.14    |
| model 2 | <25 percentile (reference)  | -    | -           |         |
|         | ≥25 to <50 percentile       | 0.57 | 0.14, 2.24  | 0.42    |
|         | ≥50 to <75 percentile       | 0.14 | 0.03, 0.70  | 0.018   |
|         | ≥75 percentile              | 0.20 | 0.04, 0.95  | 0.043   |
| model 1 | Pickles                     | 0.98 | 0.92, 1.05  | 0.56    |
| model 2 | <25 percentile (reference)  | -    | -           |         |
|         | ≥25 to <50 percentile       | 2.06 | 0.48, 8.91  | 0.33    |
|         | ≥50 to <75 percentile       | 1.97 | 0.46, 8.41  | 0.36    |
|         | ≥75 percentile              | 2.94 | 0.69, 12.53 | 0.15    |
| model 1 | Mushrooms                   | 0.95 | 0.85, 1.06  | 0.37    |
| model 2 | <25 percentile (reference)  | -    | -           |         |
|         | ≥25 to <50 percentile       | 0.68 | 0.18, 2.61  | 0.58    |
|         | ≥50 to <75 percentile       | 0.59 | 0.14, 2.43  | 0.47    |
|         | ≥75 percentile              | 0.30 | 0.07, 1.29  | 0.11    |
| model 1 | Seaweeds                    | 0.85 | 0.76, 0.95  | 0.005   |
| model 2 | <25 percentile (reference)  | -    | -           |         |
|         | ≥25 to <50 percentile       | 1.11 | 0.28, 4.45  | 0.88    |

|         |                            |      |            |       |
|---------|----------------------------|------|------------|-------|
|         | ≥50 to <75 percentile      | 0.07 | 0.01, 0.40 | 0.003 |
|         | ≥75 percentile             | 0.08 | 0.01, 0.44 | 0.004 |
| model 1 | Green tea                  | 1.00 | 1.00, 1.00 | 0.91  |
| model 2 | <25 percentile (reference) | -    | -          |       |
|         | ≥25 to <50 percentile      | 1.20 | 0.31, 4.64 | 0.79  |
|         | ≥50 to <75 percentile      | 1.53 | 0.39, 6.01 | 0.55  |
|         | ≥75 percentile             | 0.82 | 0.21, 3.22 | 0.78  |
| model 1 | Rice                       | 1.00 | 1.00, 1.01 | 0.33  |
| model 2 | <25 percentile (reference) | -    | -          |       |
|         | ≥25 to <50 percentile      | 0.15 | 0.03, 0.77 | 0.022 |
|         | ≥50 to <75 percentile      | 1.52 | 0.40, 5.84 | 0.54  |
|         | ≥75 percentile             | 1.19 | 0.28, 5.08 | 0.82  |
| model 1 | Miso soup                  | 0.99 | 0.98, 1.00 | 0.18  |
| model 2 | <25 percentile (reference) | -    | -          |       |
|         | ≥25 to <50 percentile      | 0.31 | 0.08, 1.22 | 0.09  |
|         | ≥50 to <75 percentile      | 0.28 | 0.07, 1.11 | 0.07  |
|         | ≥75 percentile             | 0.27 | 0.07, 1.10 | 0.07  |
| model 1 | Beef and pork              | 1.01 | 0.97, 1.05 | 0.61  |
| model 2 | <25 percentile (reference) | -    | -          |       |
|         | ≥25 to <50 percentile      | 0.36 | 0.09, 1.49 | 0.16  |
|         | ≥50 to <75 percentile      | 0.63 | 0.16, 2.45 | 0.51  |
|         | ≥75 percentile             | 1.18 | 0.31, 4.55 | 0.81  |
| model 1 | Coffee                     | 1.00 | 1.00, 1.01 | 0.53  |
| model 2 | <25 percentile (reference) | -    | -          |       |
|         | ≥25 to <50 percentile      | 0.34 | 0.07, 1.64 | 0.18  |
|         | ≥50 to <75 percentile      | 0.66 | 0.16, 2.72 | 0.56  |
|         | ≥75 percentile             | 0.63 | 0.15, 2.59 | 0.52  |

In logistic regression analysis with intermediate–high-risk Agile 3+ score as the outcome, sex, age, BMI, diabetes mellitus, hypertension, dyslipidemia, alcohol intake, and medication status (ursodeoxycholic acid, calcium channel blocker, angiotensin receptor blocker, diuretic agent, HMG-CoA reductase inhibitor, tocopherol acetate, dipeptidyl peptidase-4 inhibitor, sodium-glucose cotransporter 2 inhibitor, biguanide, and hypouricemic agent) were included as covariates and the propensity score was calculated. We tested the association between mJDI12 components and intermediate–high-risk Agile 3+ scores in independent models with the calculated propensity score as one variable in the covariate. In model 1, mJDI12 components were imputed as a crude value. In model 2, mJDI12 components were imputed as a quartile. OR, odds ratio; CI, confidence interval.

Table S3 Logistic regression analysis of mJDI12 components for skeletal muscle mass 75th percentile or higher

|         |                             | OR   | 95%CI       | p value |
|---------|-----------------------------|------|-------------|---------|
| model 1 | Soybeans and soybean foods  | 1.02 | 1.00, 1.04  | 0.049   |
| model 2 | <25 percentile (reference)  | -    | -           |         |
|         | ≥25 to <50 percentile       | 1.86 | 0.56, 6.13  | 0.31    |
|         | ≥50 to <75 percentile       | 1.93 | 0.59, 6.27  | 0.28    |
|         | ≥75 percentile              | 3.07 | 0.95, 9.91  | 0.06    |
| model 1 | Green and yellow vegetables | 1.00 | 0.98, 1.01  | 0.42    |
| model 2 | <25 percentile (reference)  | -    | -           |         |
|         | ≥25 to <50 percentile       | 0.60 | 0.19, 1.88  | 0.38    |
|         | ≥50 to <75 percentile       | 1.15 | 0.38, 3.49  | 0.81    |
|         | ≥75 percentile              | 0.76 | 0.24, 2.40  | 0.64    |
| model 1 | Fruit                       | 1.00 | 1.00, 1.01  | 0.41    |
| model 2 | <25 percentile (reference)  | -    | -           |         |
|         | ≥25 to <50 percentile       | 3.72 | 1.09, 12.68 | 0.036   |
|         | ≥50 to <75 percentile       | 2.31 | 0.71, 7.51  | 0.17    |
|         | ≥75 percentile              | 2.93 | 0.86, 9.98  | 0.09    |
| model 1 | Fish and shellfish          | 1.00 | 0.98, 1.01  | 0.61    |
| model 2 | <25 percentile (reference)  | -    | -           |         |
|         | ≥25 to <50 percentile       | 1.01 | 0.33, 3.13  | 0.99    |
|         | ≥50 to <75 percentile       | 1.50 | 0.50, 4.56  | 0.47    |
|         | ≥75 percentile              | 1.13 | 0.36, 3.58  | 0.84    |
| model 1 | Pickles                     | 0.99 | 0.94, 1.05  | 0.84    |
| model 2 | <25 percentile (reference)  | -    | -           |         |
|         | ≥25 to <50 percentile       | 0.95 | 0.31, 2.87  | 0.92    |
|         | ≥50 to <75 percentile       | 1.19 | 0.40, 3.57  | 0.76    |
|         | ≥75 percentile              | 0.58 | 0.18, 1.87  | 0.36    |
| model 1 | Mushrooms                   | 1.01 | 0.94, 1.08  | 0.77    |
| model 2 | <25 percentile (reference)  | -    | -           |         |
|         | ≥25 to <50 percentile       | 0.46 | 0.14, 1.58  | 0.22    |
|         | ≥50 to <75 percentile       | 1.49 | 0.48, 4.68  | 0.49    |
|         | ≥75 percentile              | 1.52 | 0.50, 4.66  | 0.46    |
| model 1 | Seaweeds                    | 1.02 | 0.96, 1.07  | 0.61    |
| model 2 | <25 percentile (reference)  | -    | -           |         |
|         | ≥25 to <50 percentile       | 0.96 | 0.29, 3.23  | 0.95    |

|         |                            |      |            |      |
|---------|----------------------------|------|------------|------|
|         | ≥50 to <75 percentile      | 2.97 | 0.92, 9.52 | 0.07 |
|         | ≥75 percentile             | 1.40 | 0.43, 4.58 | 0.58 |
| model 1 | Green tea                  | 1.00 | 1.00, 1.00 | 0.90 |
| model 2 | <25 percentile (reference) | -    | -          |      |
|         | ≥25 to <50 percentile      | 0.85 | 0.28, 2.64 | 0.78 |
|         | ≥50 to <75 percentile      | 1.15 | 0.38, 3.48 | 0.81 |
|         | ≥75 percentile             | 0.99 | 0.32, 3.05 | 0.99 |
| model 1 | Rice                       | 1.00 | 1.00, 1.01 | 0.93 |
| model 2 | <25 percentile (reference) | -    | -          |      |
|         | ≥25 to <50 percentile      | 0.99 | 0.33, 2.99 | 0.99 |
|         | ≥50 to <75 percentile      | 0.36 | 0.11, 1.25 | 0.11 |
|         | ≥75 percentile             | 1.09 | 0.36, 3.28 | 0.88 |
| model 1 | Miso soup                  | 1.00 | 0.99, 1.00 | 0.26 |
| model 2 | <25 percentile (reference) | -    | -          |      |
|         | ≥25 to <50 percentile      | 1.26 | 0.41, 3.85 | 0.69 |
|         | ≥50 to <75 percentile      | 0.61 | 0.20, 1.91 | 0.40 |
|         | ≥75 percentile             | 0.93 | 0.30, 2.87 | 0.90 |
| model 1 | Beef and pork              | 0.99 | 0.95, 1.02 | 0.35 |
| model 2 | <25 percentile (reference) | -    | -          |      |
|         | ≥25 to <50 percentile      | 0.60 | 0.20, 1.83 | 0.37 |
|         | ≥50 to <75 percentile      | 0.69 | 0.23, 2.08 | 0.50 |
|         | ≥75 percentile             | 0.51 | 0.16, 1.59 | 0.25 |
| model 1 | Coffee                     | 1.00 | 1.00, 1.00 | 0.69 |
| model 2 | <25 percentile (reference) | -    | -          |      |
|         | ≥25 to <50 percentile      | 1.96 | 0.61, 6.25 | 0.26 |
|         | ≥50 to <75 percentile      | 0.75 | 0.23, 2.43 | 0.63 |
|         | ≥75 percentile             | 1.74 | 0.54, 5.61 | 0.35 |

In logistic regression analysis for sex specific skeletal muscle mass 75th percentile or higher, sex, age, BMI, diabetes mellitus, hypertension, dyslipidemia, alcohol intake, were included as covariates and propensity score was calculated. We tested the association between mJDI12 components and skeletal muscle mass 75th percentile of more in a model with the calculated propensity score as one variable in the covariate. In model 1, each mJDI12 component was imputed as crude value. In model 2, each mJDI12 component was imputed as a sex specific quartile. OR; odds ratio, CI; confidence interval; mJDI12; 12-component modified Japanese diet index, BMI; body mass index
